1 **Systematic analysis of REBASE identifies numerous Type I restriction-modification systems**  
2 **that contain duplicated, variable *hsdS* specificity genes that randomly switch**  
3 **methyltransferase specificity by recombination.**

4

5

6 John M. Atack<sup>1\*†</sup>, Chengying Guo<sup>2\*</sup>, Thomas Litfin<sup>3</sup>, Long Yang<sup>2</sup>, Patrick J. Blackall<sup>4</sup>, Yaoqi  
7 Zhou<sup>1,3</sup>, Michael P. Jennings<sup>1†</sup>

8

9

10 <sup>1</sup> Institute for Glycomics, Griffith University, Gold Coast, Queensland 4222, Australia.

11 <sup>2</sup> College of Plant Protection, Shandong Agricultural University, Taian City, Shandong Province,  
12 271018, China

13 <sup>3</sup>School of Information and Communication Technology, Griffith University, Gold Coast,  
14 Queensland 4222, Australia.

15 <sup>4</sup> Queensland Alliance for Agriculture and Food Innovation, The University of Queensland, St.  
16 Lucia, Queensland, 4072, Australia

17

18 **Running title:** Prevalence of inverted repeats in Type I R-M systems

19

20 \* Co-first author

21

22 † To whom correspondence should be addressed: Michael P. Jennings, Institute for Glycomics,  
23 Griffith University, Gold Coast, Queensland 4215 Australia, Tel: (+61) 07 55527050; Fax: (+61) 07  
24 55527050; E-mail: m.jennings@griffith.edu.au; or John M. Atack, Institute for Glycomics, Griffith  
25 University, Gold Coast, Queensland 4215 Australia, Tel: (+61) 07 56780580; Fax: (+61) 07  
26 55527050; E-mail: j.atack@griffith.edu.au

27

28

## 29 **Abstract**

30  $N^6$ -adenine DNA methyltransferases associated with some Type I and Type III restriction-  
31 modification (R-M) systems are able to randomly switch expression by variation in the length of  
32 locus-encoded simple sequence repeats (SSRs). SSR tract-length variation causes ON/OFF  
33 switching of methyltransferase expression, resulting in genome-wide methylation differences, and  
34 global changes in gene expression. These epigenetic regulatory systems are called phasevarions,  
35 phase-variable regulons, and are widespread in bacteria. A distinct switching system has also been  
36 described in Type I R-M systems, based on recombination-driven changes in *hsdS* genes, which  
37 dictate the DNA target site. In order to determine the prevalence of recombination-driven  
38 phasevarions, we generated a program called RecombinationRepeatSearch to interrogate REBASE  
39 and identify the presence and number of inverted repeats of *hsdS* downstream of Type I R-M loci.  
40 We report that 5.9% of Type I R-M systems have duplicated variable *hsdS* genes containing  
41 inverted repeats capable of phase-variation. We report the presence of these systems in the major  
42 pathogens *Enterococcus faecalis* and *Listeria monocytogenes*, which will have important  
43 implications for pathogenesis and vaccine development. These data suggest that in addition to SSR-  
44 driven phasevarions, many bacteria have independently evolved phase-variable Type I R-M  
45 systems via recombination between multiple, variable *hsdS* genes.

## 46 **Importance**

47 Many bacterial species contain DNA methyltransferases that have random on/off switching of  
48 expression. These systems called phasevarions (phase-variable regulons) control the expression of  
49 multiple genes by global methylation changes. In every previously characterised phasevarion, genes  
50 involved in pathobiology, antibiotic resistance, and potential vaccine candidates are randomly  
51 varied in their expression, commensurate with methyltransferase switching. A systematic study to  
52 determine the extent of phasevarions controlled by invertible Type I R-M systems has never before  
53 been performed. Understanding how bacteria regulate genes is key to the study of physiology,  
54 virulence, and vaccine development; therefore it is critical to identify and characterize phase-  
55 variable methyltransferases controlling phasevarions.

56

57

## 58 **Introduction**

59 Phase variation is the high frequency, random and reversible switching of gene expression (1).  
60 Many host-adapted bacterial pathogens possess surface features such as iron acquisition systems (2,  
61 3), pili (4), adhesins (5, 6), and lipooligosaccharide (7, 8) that undergo phase-variable ON-OFF  
62 switching of expression by variation in the length of locus encoded simple sequence repeats (SSRs)  
63 (1). Variations in SSRs result in the encoded gene being in-frame and expressed (ON), or due to a  
64 frameshift downstream of the SSR tract, out-of-frame and not expressed (OFF). Several bacterial  
65 pathogens also contain well characterised cytoplasmic  $N^6$ -adenine DNA methyltransferases, that are  
66 part of restriction-modification (R-M) systems, that exhibit phase-variable expression. We recently  
67 characterised the distribution of SSR tracts in Type III *mod* genes and Type I *hsdS*, *hsdM*, and *hsdR*  
68 genes in the REBASE database of restriction-modification (R-M) systems, and demonstrated that  
69 17.4% of all Type III *mod* genes (9), and 10% of all Type I R-M systems contain SSRs that are  
70 capable of undergoing phase-variable expression. Phase variation of methyltransferase expression  
71 leads to genome-wide methylation differences, which can result in differential regulation of  
72 multiple genes in systems known as phasevarions (phase-variable regulon). Phasevarions controlled  
73 by ON-OFF switching of Type III *mod* genes has been well-characterised in a number of host-  
74 adapted bacterial pathogens, such as *Haemophilus influenzae* (10, 11), *Neisseria* spp. (12),  
75 *Helicobacter pylori* (13), *Moraxella catarrhalis* (14, 15), and *Kingella kingae* (16) (reviewed in  
76 (17)). Although we have recently demonstrated that almost 10% of Type I R-M systems contain  
77 SSRs, and can potentially undergo phase variation, to-date phase-variable expression of Type I R-M  
78 systems has only been demonstrated in two species: an *hsdM* gene switches ON-OFF via SSRs  
79 changes in non-typeable *Haemophilus influenzae* (NTHi) (7, 18), and an *hsdS* gene phase varies due  
80 to SSRs alterations in *Neisseria gonorrhoeae* (19). The *hsdS* gene in *N. gonorrhoeae*, encoding the  
81 NgoAV Type I system, contains a  $G_{[n]}$  SSR tract, with variation in the length of this tract resulting  
82 in either a full length or a truncated HsdS protein being produced, rather than an ON-OFF switch  
83 seen with the *hsdM* gene in NTHi and Type III *mod* genes. The full length and truncated HsdS  
84 proteins produced from phase variation of the NgoAV system have differing methyltransferase  
85 specificities (19).

86

87 Type I *hsdS* genes can also undergo phase-variation by recombination between inverted repeats  
88 (IRs) encoded in multiple variable copies of *hsdS* genes encoded in the Type I R-M locus (20) and  
89 reviewed in (21) (Figure 1A). These systems have been named ‘inverting’ Type I loci, as they  
90 phase-vary via ‘inversions’ between the IRs located in the multiple variable *hsdS* genes. The  
91 generation of sequence variation by shuffling between multiple protein variants through inverted

92 repeat recombination is perhaps best studied in *pilE* gene encoding pili in *N. gonorrhoeae* (22, 23)  
93 and *N. meningitidis* (24). In these systems recombination between a single expressed locus, *pilE*,  
94 and multiple adjacent, silent copies of the gene, *pilS*, generate PilE pilin subunit proteins with  
95 distinct amino acid sequences. In Type I R-M systems, each HsdS specificity protein is made up of  
96 two ‘half’ Target Recognition Domains (TRDs), with each TRD contributing half to the overall  
97 specificity of the HsdS protein (Figure 1A). Therefore, changing a single TRD coding region will  
98 change the overall specificity of the encoded HsdS protein. The first example of a phasevarion  
99 controlled by an inverting Type I R-M system was described in the major human pathogen  
100 *Streptococcus pneumoniae* strain D39 (20), and subsequent studies have been conducted in strain  
101 TIGR4 (25). This system contains multiple variable *hsdS* loci with inverted repeats, and a locus  
102 encoded recombinase, and switches between six alternate HsdS proteins that encode six different  
103 methyltransferase specificities (20), and control six different phasevarions. We recently  
104 demonstrated the presence of an inverting Type I R-M system in *Streptococcus suis* that switches  
105 expression between four alternate HsdS subunits (26). The presence of other inverting Type I  
106 systems containing multiple variable *hsdS* genes has also been observed *ad hoc* in several bacterial  
107 species, including *Porphyromonas gingivalis* and *Tannerella forsythia* (21, 27). In this study, we  
108 carried out a systematic study of the ‘gold-standard’ restriction enzyme database REBASE using a  
109 purpose-designed program to systematically identify inverted repeats in *hsdS* genes in order to  
110 determine the prevalence of inverting Type I systems in the bacterial domain.

111

112

113

114

## 115 **Results**

116 ***A systematic search of REBASE reveals that approximately 6% of all Type I R-M systems***  
117 ***contain duplicated *hsdS* loci containing inverted repeats***

118 In order to identify all Type I *hsdS* genes containing inverted repeats (IRs), we searched the  
119 restriction enzyme database, REBASE (33), for *hsdS* genes, then searched within 30kb of the start  
120 and end of the annotated *hsdS* for inverted repeats (IRs) matching a region of the *hsdS* gene being  
121 analysed (see Figure 2). Using the 22,107 *hsdS* genes annotated in REBASE (Supplementary Data  
122 1), we show that 3683 of these *hsdS* genes contain at least one  $\geq 20$ bp sequence with 100% identity  
123 to a region that is inverted (i.e., an inverted repeat) and within 30kb of the *hsdS* gene under analysis  
124 (Supplementary Data 2). We strictly set our criteria to only select inverted repeats that were 100%  
125 identical, and of a minimum size of 20bp in length. This rationale was based on the SpnD39III  
126 system, which we described in 2014 (20). The SpnD39III locus contains three different IR regions

127 that are 15bp, 85bp, and 33bp long, encoded within multiple variable *hsdS* genes. Therefore, setting  
128 our minimum length criteria for an IR at 20bp means any IRs detected are above the length shown  
129 previously to result in homologous recombination between variable *hsdS* genes.

130

131 We carried out our search for inverted repeats using a bespoke perl script (irepeat.upstream.pl),  
132 which we have made available at [https://github.com/GuoChengying-7824/type\\_I](https://github.com/GuoChengying-7824/type_I). This script was  
133 also implemented as a simple, easy-to-use server called ‘RecombinationRepeatSearch’, which can  
134 be found at <https://sparks-lab.org/server/recombinationrepeatsearch/>. This software allows a user to  
135 input any gene or DNA sequence (e.g., an *hsdS* gene) and by providing the relevant upstream and  
136 downstream DNA sequence (e.g., the *hsdS* gene plus 30kb upstream and downstream as a single  
137 sequence), the software is able to locate regions containing inverted repeats (see Figure 2).

138

139 Our analysis showed that of the 3683 *hsdS* genes containing at least one IR, many *hsdS* genes had  
140 more than one downstream IR, and so were counted twice (for an *hsdS* gene with two downstream  
141 inverted repeats), three times (for an *hsdS* gene with three downstream inverted repeats), and so on.  
142 Therefore, in order to determine the number of individual *hsdS* genes with at least one downstream  
143 IR, we collated together all identical *hsdS* genes. Following this collation, we show that 991  
144 individual Type I R-M loci have *hsdS* genes with *at least* one IR located within 30kb  
145 (Supplementary Data 3). Taking into account all bacterial strains with at least one full Type I R-M  
146 system (at least one *hsdR*, *hsdM* and *hsdS* gene; 14830 strains in total) and where the IR(s) are in a  
147 second, duplicated *hsdS* within the same Type I R-M locus, 875 contain at least one IR in a second,  
148 duplicated, variable *hsdS* gene within the same Type I locus. This equates to 5.9% (875/14830) of  
149 all Type I R-M systems being potentially phase-variable, and therefore able to control phasevarions.

150

151 Our analysis shows that some bacterial species contain a relatively low proportion of examples of  
152 strains that have IRs within 30kb of annotated *hsdS* genes. For example, there are 428  
153 *Staphylococcus aureus* genomes in REBASE, and of these, only 5 contain an *hsdS* gene with an IR  
154 located within 30kb (Supplementary Data 3); of the 232 *Pseudomonas aeruginosa* genomes  
155 examined, only 1 contained an *hsdS* with an IR found within 30kb. Detailed analysis of these  
156 regions revealed that the IR found within 30kb of the annotated *hsdS* gene in *P. aeruginosa* strain  
157 SPA01 (accession number LQBU01000001) is only 28bp long, and although it is possible that  
158 inversions do occur between these inverted repeats, the IR is not in a locus annotated as an *hsdS*.  
159 Manual examination of the 5 IRs found within 30kb of annotated *hsdS* genes in *S. aureus* also do  
160 not appear in a second annotated *hsdS* locus. Three of these inverted repeats in *S. aureus*  
161 are >200bp long (in strains 333, M013, and UCI 48); for example, the IR found within 30kb of the

162 *hsdS* annotated as S.SauM013ORF1818P in *S. aureus* strain M013 (accession number CP003166;  
163 Supplementary Data 1 & 2) is 529bp long. The S.SauM013ORF1818P locus is itself 531bp long. It  
164 is likely that these two regions are able to recombine, and flank a region including genes for a  
165 hyaluronate lyase and a metalloproteinase. It was recently demonstrated in *S. aureus* that  
166 recombination between two Type I loci approximately 1.26Mb apart are able to mediate genome  
167 inversions (34). It is therefore possible that a small proportion of the large (>200bp) IRs we  
168 identified in our search (Supplementary Data 2) are part of larger inverting DNA segments, and not  
169 associated with individual Type I loci that undergo rearrangements between expressed and silent  
170 *hsdS* genes contained in a single Type I locus, i.e, not part of inverting Type I R-M systems.

171  
172 Using the SpnD39III system present in *S. pneumoniae*, which we identified as the first inverting,  
173 phase-variable Type I R-M system, and the first example of a phasevarion in a Gram-positive  
174 bacterium (20), we show that of the 78 *S. pneumoniae* strains listed in REBASE, all of the strains  
175 where we were able to obtain the annotated genome (52 total) contain the SpnD39III system. This  
176 confirmed the findings in our 2014 study, where we showed every genome in GenBank (n=262)  
177 contained a Type I locus where inverted variable *hsdS* genes were present (20). Our systematic  
178 search of REBASE also identified the Type I system in *S. suis* which we have previously shown to  
179 shuffle between four different HsdS proteins (26). These findings serve as a ‘positive control’ for  
180 our search methodology, in that it is able to identify systems previously shown to contain IRs and to  
181 be phase-variable by *ad-hoc* searches.

182  
183 Our search confirms the presence of inverting Type I R-M systems with downstream IRs identified  
184 previously. For example, we show that 7 out of 15 strains of *P. gingivalis* with an annotated  
185 genome in REBASE contain *hsdS* genes with IRs located within 30kb, and 2 out of 7 strains of *T.*  
186 *forsythia* contain annotated *hsdS* genes where IRs are present within 30kb (27). Our analysis of  
187 these regions confirmed the IRs to be present in a second, variable *hsdS* gene that is part of the  
188 same Type I R-M locus, and which we class as an inverting, i.e., a phase-variable Type I locus.  
189 Using these systems as an example, and based on previous work with the SpnIII system in *S.*  
190 *pneumoniae* (20), and the inverting Type I system in *S. suis* (26), we analysed the regions  
191 immediately upstream of both *hsdS* genes present in each individual *P. gingivalis* and *T. forsythia*  
192 Type I locus containing IRs. This analysis demonstrated that only the *hsdS* gene immediately  
193 downstream of the *hsdM* gene is a functional open-reading frame, with the second downstream *hsdS*  
194 gene encoded on the opposite strand being silent (*hsdS'*), as this second gene does not contain an  
195 ATG start codon or a region recognised as a promoter using the bacterial promoter prediction tools  
196 CNNpromoter\_b (35) and PePPER (36).



197

198 ***Three major veterinary pathogens contain Type I R-M systems containing duplicated variable***  
199 ***hsdS loci***

200 Many species contained a high prevalence strains with *hsdS* genes with downstream IRs, and with  
201 these IRs located within a separate, variable *hsdS* genes that were part of the same Type I locus  
202 containing the *hsdS* gene under study. For example, we identified Type I R-M systems with  
203 multiple *hsdS* genes in two major veterinary pathogens, in addition to the one identified in *S. suis*  
204 (Figure 3A; Supplementary Data 3). In the pig pathogen, *Actinobacillus pleuropneumoniae*, of the  
205 23 genomes available in REBASE, 18 contain at least one Type I R-M system with multiple,  
206 variable inverted *hsdS* loci, and with these *hsdS* genes containing the IRs identified by our search.  
207 In the cattle pathogen *Mannheimia haemolytica*, 19 out of the 23 strains surveyed contain at least  
208 one Type I R-M system with multiple, variable inverted *hsdS* loci with IRs. Detailed examination of  
209 each of the inverting Type I R-M systems we identified in *A. pleuropneumoniae* and *M.*  
210 *haemolytica* showed that these systems also contain a gene encoding a recombinase/integrase, and  
211 additional genes encoding proteins unknown function (Figure 3A). In addition, our survey  
212 demonstrated that 24 out of 42 *S. suis* strains analysed contain an inverting Type I system,  
213 confirming our earlier observation that the Type I system in this species is not present in all strains,  
214 but conserved within a virulent lineage that causes zoonotic infections (26). In all three of these  
215 veterinary pathogens, two IRs are present in a second distinct *hsdS* gene (*hsdS'*) immediately  
216 downstream of the *hsdS* understudy, and part of the same Type I R-M locus (Figure 1).  
217 Examination of the location of each pair of IRs present in these two *hsdS* genes demonstrated they  
218 occurupstream of the 5'-TRD , and between the 5'-TRD and 3'-TRD (Figure 1, Figure 3). The  
219 presence of multiple IRs that are in a second variable *hsdS* gene (*hsdS'*) immediately downstream of  
220 the *hsdS* gene under study is highly indicative that these *hsdS* genes undergo inversions, i.e., they  
221 are phase-variable.

222

223 We cloned and over-expressed two *hsdS* alleles, alleles A and B, of the Type I inverting system that  
224 we found in *S. suis* (26) in order to solve the methyltransferase specificity of the Type I  
225 methyltransferases containing these HsdS proteins. We have used this approach extensively with  
226 Type III *mod* genes in order to solve specificity (5, 9), with the same site observed using the native  
227 protein using genomic DNA from the actual species and the over-expressed protein in *E. coli* (26).  
228 We only expressed HsdS alleles A and B as we do not observe any strains of *S. suis* with annotated  
229 genomes where either allele C or allele D (Figure 3B) is present in the *hsdS* expressed locus  
230 immediately downstream of the *hsdM* (26). This approach demonstrated that allele A methylates the  
231 sequence CC<sup>m6</sup>AN<sub>(8)</sub>CTT, and allele B methylates the sequence CC<sup>m6</sup>AN<sub>(6)</sub>DNH (D = A, G, or T; H

232 = A, C, or T; N = any nucleotide). This is consistent with allele A and allele B sharing the same 5'-  
233 TRD (giving the same half recognition sequence of CCA), but a different 3'-TRD (giving different  
234 half recognition sequences of CTT, and DNH, respectively) (Figure 3B). Solving the specificity of  
235 the two most common alleles found in the expressed *hsdS* locus of this phase-variable system (26)  
236 provides valuable information required to fully characterise the gene expression differences that  
237 result from the phase-variation of this system.

238

239 ***The major human and veterinary pathogen *Listeria monocytogenes* contains an inverting Type I***  
240 ***R-M system that appears to be associated with virulence***

241 Our analysis shows that an inverting Type I R-M system is present in approximately half of all  
242 strains of *Listeria monocytogenes* that are deposited in REBASE (60 out of 123 strains). This  
243 inverting Type I system was previously identified in *L. monocytogenes* ST8 strains associated with  
244 disease in aquaculture and poultry farming (21, 37). Different *hsdS* sequences are present in the  
245 expressed *hsdS* locus of multiple strains of *L. monocytogenes* (37), although no recombination has  
246 been demonstrated within an individual strain. Phylogenetic analysis of these strains (Figure 4)  
247 shows that strains containing this system cluster in specific clades. This data suggests that selection  
248 and expansion of strains containing this system is occurring, with a possible association between  
249 this system and with strains that persist in fish and chickens (37). Analysis of the phenotypes  
250 regulated by this system may have an impact on vaccine and pathogenesis studies of this important  
251 human and veterinary pathogen.

252

253 ***The nosocomial, antibiotic-resistant pathogen *Enterococcus faecalis* contains a highly diverse***  
254 ***phase variable Type I R-M locus that is widely distributed.***

255 We identify a Type I R-M system containing multiple variable *hsdS* loci containing IRs present in  
256 *Enterococcus faecalis*, a multidrug-resistant, nosocomial pathogen of major medical importance.  
257 This system has been previously noted to occur in a single strain of *E. faecalis* (21), but no  
258 systematic study of the distribution of this system in *E. faecalis* had been carried out. This system is  
259 present in 24 out of the 34 strains of *E. faecalis* present in REBASE. Analysis of the sequences of  
260 each of the 24 Type I loci containing duplicated *hsdS* genes (Figure 5A) shows a high level of  
261 variability at each individual *hsdS* locus, with thirteen different 5'-TRDs, and sixteen different 3'-  
262 TRDs present in the *hsdS* genes annotated in REBASE. This data is highly indicative of shuffling of  
263 TRDs, and shows significant inter-strain variability. Our phylogenetic analysis of the strains of *E.*  
264 *faecalis* containing this system (Figure 5B) shows that the presence of the Type I R-M system is  
265 widely distributed within the overall *E. faecalis* population, and not associated with a particular  
266 lineage or groups of strains. This inverting Type I R-M locus also contains an



267 integrase/recombinase, in addition to multiple variable *hsdS* genes containing IRs, adding further  
268 weight to the evidence that this system is phase-variable.

269

## 270 Discussion

271 This is the first time, to our knowledge, that a systematic study has been carried out to identify Type  
272 I R-M systems that contain inverted repeats that are capable of mediating phase-variable expression,  
273 and thereby potentially control phasevarions. A previous study demonstrated that  
274 integrases/recombinases with high homology to the integrase present in the SpnD39III locus (20)  
275 were widespread in the bacterial domain (21). In order to carry out our systematic analysis, we  
276 designed software to specifically search for inverted repeats in DNA (code available at  
277 [https://github.com/GuoChengying-7824/type\\_I](https://github.com/GuoChengying-7824/type_I)), and applied strict selection criteria so that we only  
278 identified inverted DNA repeats that are longer than those that have previously been shown to result  
279 in homologous recombination between variable *hsdS* genes (20). We limited the distance away  
280 from the *hsdS* locus under study (30kb) in order to only identify distinct ‘inverting’ Type I R-M  
281 systems. We have made this software available as a user-friendly server  
282 (RecombinationRepeatSearch; <https://sparks-lab.org/server/recombinationrepeatsearch/>), which  
283 allows the user to search any DNA sequence for inverted repeat regions.

284

285 By limiting our selection criteria (100% IR identity; minimum IR length of 20bp; 30kb window  
286 upstream and downstream each *hsdS*), we have likely missed some Type I loci that are ‘inverting’;  
287 for example, we will miss any IRs that are <20bp, and we would not detect any *hsdS* containing IRs  
288 that are over 30kb away. However, we would argue that *hsdS* genes located over 30kb away from  
289 each other would not comprise a single ‘inverting’ Type I *hsd* locus, and that the recombination of  
290 these separate *hsdS* genes may not control phasevarions. We also identified a small number of large  
291 (>200bp) IRs present within 30kb of annotated *hsdS* genes, but a manual examination of these  
292 systems revealed that the IRs are not present in a second *hsdS* gene.

293

294 Our systematic analysis of REBASE identified Type I loci containing multiple *hsdS* genes where  
295 we detect IRs in a range of commensal organisms such as *Bacteroides fragilis* and multiple  
296 *Ruminococcus* species, in environmental bacterial species such as *Leuconostoc mesenteroides*, and  
297 in a number of *Lactobacillus* species that are important to the biotechnology and food production  
298 industries (Supplementary Data 3). This reflects our previous studies where we observed simple  
299 sequence repeats that mediate phase-variation in multiple Type I (38) and Type III  
300 methyltransferase genes (9) present in a variety of commensal and environmental organisms. One  
301 obvious reason for generating diversity in methyltransferase specificity is that it will increase

302 resistance to bacteriophage. However, in every case where a methyltransferase has been  
303 demonstrated to phase-vary, it has also been shown to comprise a phasevarion; therefore in addition  
304 to improving survival when exposed to bacteriophage, phase-variable methyltransferases are also  
305 likely to increase the phenotypic diversity present in a bacterial population, providing bacteria that  
306 encode them an extra contingency strategy to deal with changing environmental conditions. It will  
307 be interesting to determine how such plasticity of gene expression would be advantageous in a  
308 changing environment that cannot be dealt with via conventional “sense and respond” gene  
309 regulation strategies (1), particularly as regards phage resistance.

310  
311 We identified multiple variable *hsdS* loci that contain IRs in the major human pathogens *L.*  
312 *monocytogenes* and *E. faecalis*. Our analysis also demonstrated that a variety of veterinary  
313 pathogens, contain Type I systems where IRs are present in multiple variable *hsdS* genes. Many of  
314 the veterinary pathogens that we show contain inverting Type I loci also contain separate, distinct  
315 Type III or Type I R-M systems that are capable of phase-varying via changes in locus located  
316 simple sequence repeats. These species include *Actinobacillus pleuropneumoniae*, *Mannheimia*  
317 *haemolytica*, *Streptococcus suis*, *Haemophilus (Glasserella) parasuis*, and multiple *Mycoplasma*  
318 species (9, 38). This means all these veterinary pathogens have evolved phase-variation of both  
319 Type I and Type III methyltransferases, and in the case of Type I systems, by both SSR tract length  
320 changes (38) and by recombination between variable *hsdS* genes containing IRs (this study). For  
321 example, *A. pleuropneumoniae* encodes two distinct Type III methyltransferase (*mod*) genes  
322 containing simple sequence repeats (9), and a Type I system containing variable *hsdS* loci where  
323 IRs are present (this study; Figure 3A). We predict that this inverting Type I system switches  
324 between four separate *hsdS* genes, and therefore results in four different methyltransferase  
325 specificities. This means that there are a total of sixteen different combinations of methyltransferase  
326 activity potentially present in a population of *A. pleuropneumoniae*. Therefore it is critical to  
327 determine the genes and proteins that are part of the phasevarions in these species, although this  
328 will not be a simple task due the breadth and diversity of the variable methyltransferases present in  
329 these organisms.

330  
331 In summary, we identify that 5.9% of Type I R-M systems contain duplicated variable *hsdS* genes  
332 containing inverted repeats, are likely to phase vary, and consequently comprise a phasevarion. A  
333 broad range of bacterial species encode these systems. Our previous work showed that 2% of Type I  
334 *hsdM* and 7.9% of Type I *hsdS* genes contain SSRs (38). Together with our findings in this study,  
335 this means that 15.8% of all Type I systems are capable of phase-variable expression. In addition,  
336 previous studies have shown that 17.4% of Type III methyltransferases contain SSRs (9) and

337 therefore capable of phase-varying. That approximately the same percentage of two independent  
338 DNA methyltransferase systems have evolved the ability to phase-vary in expression demonstrates  
339 that generating variation via switching of methyltransferase expression is a widespread strategy  
340 used by bacteria, and that this method of increasing diversity has evolved independently multiple  
341 times. The study of phasevarions is not only key to vaccine development against pathogenic  
342 bacteria that contain them, but necessary to understand gene expression and regulation in the  
343 bacterial domain.

344

## 345 **Materials and Methods**

### 346 *REBASE survey and bioinformatics*

347 All gene sequences of Type I *hsdS* subunits were downloaded from  
348 <http://rebase.neb.com/rebase/rebase.seqs.html>. The annotation for each gene was downloaded from  
349 <http://rebase.neb.com/rebase/rebadvsearch.html>. A total of 22,107 genes were obtained with  
350 complete annotation information, which includes the start, end, and genomic information of the  
351 gene. However, the annotation does not contain the information regarding if the gene is in the  
352 positive or the negative strand of the genome. This information is obtained after aligning the gene  
353 sequence with the corresponding genomic sequence. All genomic sequences were downloaded from  
354 NCBI GenBank, and a total of 15,486 genomes were downloaded. After a gene is located in the  
355 corresponding genome, we obtained both 30kb upstream of the annotated start codon and 30kb  
356 downstream of the annotated stop codon. The 30kb upstream and downstream regions were  
357 compared against 20-500 bp fragments of the reverse gene sequence. No reverse search is  
358 performed if a gene is in the negative strand. If upstream and downstream regions contain a region  
359 mapping to a 500 bp reverse fragment, we further scanned the fragment length between 500 and  
360 1500 bp. This process is implemented by a perl script (irepeat.upstream.pl) located at  
361 [https://github.com/GuoChengying-7824/type\\_I](https://github.com/GuoChengying-7824/type_I). We also established this software as a server called  
362 RecombinationRepeatSearch, and is located at [https://sparks-](https://sparks-lab.org/server/recombinationrepeatsearch/)  
363 [lab.org/server/recombinationrepeatsearch/](https://sparks-lab.org/server/recombinationrepeatsearch/). This allows a user to input their gene of interest, and by  
364 including the respective upstream or downstream genomic sequence, they are able to determine if  
365 the DNA sequence of their gene of interest encodes inverted DNA repeats in the immediate vicinity.  
366 Following this search, all redundant repeating segments were removed by filtering. Only 100%  
367 matches for inverted repeats are recorded. All inverted repeat regions found are listed in  
368 Supplementary Data 2. Phylogenetic trees were constructed using the neighboring method  
369 (Neighbor-joining) using CVTree (Version-3.0.0) version (28, 29), with the default Hao method,  
370 and a K value of 6, as recommended for prokaryotic trees (30).

371

372 *Cloning and over-expression of the phase-variable Type I system from Streptococcus suis*

373 The entire *hsdMS* region from *S. suis* strain P1/7 containing *hsdS* allele B was cloned using primers  
374 SsuT1-oE-F (5'-AGTCAG CCATGG GG TCA ATT ACA TCA TTT GTT AAA CGA ATA CAA  
375 G) and SsuT1-oE-R (5'-AGTCAG GGATCC TCA GTA ATA AAG TTG GGC AAC TTT TTC)  
376 into the NcoI-BamHI site of vector pET15b (Novagen). In order to generate *hsdS* allele A, 3' -TRD  
377 allele 1 was synthesised as a gBLOCK (IDT) and cloned into pET15b::allele B that was linearised  
378 either side of 3'-TRD allele 2 using primers TRD-Swap-inv-F (5'-CTG CTG CCA CCG CTG AGC  
379 AAT AAC TAG C) and TRD-Swap-inv-R (5'-CTT CCC ATA AGG AGA GTT ATC ATC TCC),  
380 to generate vector pET15b::allele A. Inverse PCR using this construct was carried out with KOD  
381 polymerase (EMD Millipore) according to manufacturers instructions. Following sequencing to  
382 confirm constructs were correct, over-expression of each methyltransferase (HsdM plus either  
383 HsdS allele A or HsdS allele B) was carried out using *E. coli* BL21 cells, which were induced by  
384 the addition of IPTG to a final concentration of 0.5mM over-night at 37°C with shaking at 200rpm.  
385 Over-expression was confirmed by SDS-PAGE by comparing to an uninduced control.

386  
387 *Single-Molecule, Real-Time (SMRT) sequencing and methylome analysis*

388 Genomic DNA from *E. coli* cells expressing the *S. suis* HsdM plus either allele A or allele B HsdS  
389 were prepared using the Sigma GenElute genomic DNA kit according to the manufacturer's  
390 instructions. SMRT sequencing and methylome analysis was carried out as previously (31, 32).  
391 Briefly, DNA was sheared to an average length of approximately 10-20 kb using g-TUBEs (Covaris;  
392 Woburn, MA, USA) and SMRTbell template sequencing libraries were prepared using sheared  
393 DNA. DNA was end-repaired, then ligated to hairpin adapters. Incompletely formed SMRTbell  
394 templates were degraded with a combination of Exonuclease III (New England Biolabs; Ipswich,  
395 MA, USA) and Exonuclease VII (USB; Cleveland, OH, USA). Primer was annealed and samples  
396 were sequenced on the PacBio RS II (Menlo Park, CA, USA) using standard protocols for long  
397 insert libraries. SMRT sequencing and methylome analysis was carried out by SNPSaurus  
398 (University of Oregon, USA).

399

400

401 **Acknowledgements**

402 We thank Eric and Allison from SNPsaurus, University of Oregon, USA, for expert technical  
403 assistance in carrying out SMRT sequencing and methylome analysis.

404 This work was supported by the Australian National Health and Medical Research Council  
405 (NHMRC) Program Grant 1071659 and Principal Research Fellowship 1138466 to MPJ; Project  
406 Grant 1099279 to JMA and 1121629 to YZ; Australian Research Council (ARC) Discovery  
407 Projects 170104691 to MPJ, 180100976 to JMA and PJB, and 180102060 to YZ. Funding for open  
408 access charge: National Health and Medical Research Council, Australia.

409

410

411

412

## 413 References

- 414 1. Moxon R, Bayliss C, Hood D. 2006. Bacterial contingency loci: the role of simple sequence  
415 DNA repeats in bacterial adaptation. *Ann Rev Genet* 40:307-333.
- 416 2. Ren Z, Jin H, Whitby PW, Morton DJ, Stull TL. 1999. Role of CCAA nucleotide repeats in  
417 regulation of hemoglobin and hemoglobin-haptoglobin binding protein genes of  
418 *Haemophilus influenzae*. *J Bacteriol* 181:5865-70.
- 419 3. Richardson AR, Stojiljkovic I. 1999. HmbR, a hemoglobin-binding outer membrane protein  
420 of *Neisseria meningitidis*, undergoes phase variation. *J Bacteriol* 181:2067-74.
- 421 4. Blyn LB, Braaten BA, Low DA. 1990. Regulation of *pap* pilin phase variation by a  
422 mechanism involving differential dam methylation states. *EMBO J* 9:4045-54.
- 423 5. Attack JM, Winter LE, Jurcisek JA, Bakaletz LO, Barenkamp SJ, Jennings MP. 2015.  
424 Selection and counter-selection of Hia expression reveals a key role for phase-variable  
425 expression of this adhesin in infection caused by non-typeable *Haemophilus influenzae*. *J*  
426 *Infect Dis* 212:645-53.
- 427 6. Dawid S, Barenkamp SJ, St. Geme JW. 1999. Variation in expression of the *Haemophilus*  
428 *influenzae* HMW adhesins: A prokaryotic system reminiscent of eukaryotes. *Proc Natl Acad*  
429 *Sci U S A* 96:1077-1082.
- 430 7. Fox KL, Attack JM, Srikhanta YN, Eckert A, Novotny LA, Bakaletz LO, Jennings MP.  
431 2014. Selection for phase variation of LOS biosynthetic genes frequently occurs in  
432 progression of non-typeable *Haemophilus influenzae* infection from the nasopharynx to the  
433 middle ear of human patients. *PLoS One* 9:e90505.
- 434 8. Poole J, Foster E, Chaloner K, Hunt J, Jennings MP, Bair T, Knudtson K, Christensen E,  
435 Munson RS, Jr., Winokur PL, Apicella MA. 2013. Analysis of nontypeable *Haemophilus*  
436 *influenzae* phase variable genes during experimental human nasopharyngeal colonization. *J*  
437 *Infect Dis* 208:720-727.
- 438 9. Attack JM, Yang Y, Seib KL, Zhou Y, Jennings MP. 2018. A survey of Type III restriction-  
439 modification systems reveals numerous, novel epigenetic regulators controlling phase-  
440 variable regulons; phasevarions. *Nucleic Acids Res* 46:10.1093/nar/gky192.
- 441 10. Attack JM, Srikhanta YN, Fox KL, Jurcisek JA, Brockman KL, Clark TA, Boitano M,  
442 Power PM, Jen FEC, McEwan AG, Grimmond SM, Smith AL, Barenkamp SJ, Korlach J,  
443 Bakaletz LO, Jennings MP. 2015. A biphasic epigenetic switch controls immunoevasion,  
444 virulence and niche adaptation in non-typeable *Haemophilus influenzae*. *Nat Commun*  
445 6:doi:10.1038/ncomms8828.
- 446 11. Srikhanta YN, Maguire TL, Stacey KJ, Grimmond SM, Jennings MP. 2005. The  
447 phasevarion: A genetic system controlling coordinated, random switching of expression of  
448 multiple genes. *Proc Natl Acad Sci U S A* 102:5547-5551.
- 449 12. Srikhanta YN, Dowideit SJ, Edwards JL, Falsetta ML, Wu H-J, Harrison OB, Fox KL, Seib  
450 KL, Maguire TL, Wang AHJ, Maiden MC, Grimmond SM, Apicella MA, Jennings MP.  
451 2009. Phasevarions mediate random switching of gene expression in pathogenic *Neisseria*.  
452 *PLoS Pathog* 5:e1000400.
- 453 13. Srikhanta YN, Gorrell RJ, Steen JA, Gawthorne JA, Kwok T, Grimmond SM, Robins-  
454 Browne RM, Jennings MP. 2011. Phasevarion mediated epigenetic gene regulation in  
455 *Helicobacter pylori*. *PLoS One* 6:e27569.
- 456 14. Blakeway LV, Power PM, Jen FE, Worboys SR, Boitano M, Clark TA, Korlach J, Bakaletz  
457 LO, Jennings MP, Peak IR, Seib KL. 2014. ModM DNA methyltransferase methylome  
458 analysis reveals a potential role for *Moraxella catarrhalis* phasevarions in otitis media.  
459 *FASEB J* 28:5197-5207.
- 460 15. Seib KL, Peak IR, Jennings MP. 2002. Phase variable restriction-modification systems in  
461 *Moraxella catarrhalis*. *FEMS Immunol Med Mic* 32:159-165.



- 462 16. Srikhanta YN, Fung KY, Pollock GL, Bennett-Wood V, Howden BP, Hartland EL. 2017.  
463 Phasevarion regulated virulence in the emerging paediatric pathogen *Kingella kingae*. *Infect*  
464 *Immun* 85:e00319-17.
- 465 17. Atack JM, Tan A, Bakaletz LO, Jennings MP, Seib KL. 2018. Phasevarions of Bacterial  
466 Pathogens: Methylomics Sheds New Light on Old Enemies. *Trends in Microbiology*  
467 26:715-726.
- 468 18. Zaleski P, Wojciechowski M, Piekarowicz A. 2005. The role of Dam methylation in phase  
469 variation of *Haemophilus influenzae* genes involved in defence against phage infection.  
470 *Microbiology* 151:3361-9.
- 471 19. Adamczyk-Poplawska M, Lower M, Piekarowicz A. 2011. Deletion of One Nucleotide  
472 within the Homonucleotide Tract Present in the hsdS Gene Alters the DNA Sequence  
473 Specificity of Type I Restriction-Modification System NgoAV. *J Bacteriol* 193:6750-6759.
- 474 20. Manso AS, Chai MH, Atack JM, Furi L, De Ste Croix M, Haigh R, Trappetti C, Ogunniyi  
475 AD, Shewell LK, Boitano M, Clark TA, Korlach J, Blades M, Mirkes E, Gorban AN, Paton  
476 JC, Jennings MP, Oggioni MR. 2014. A random six-phase switch regulates pneumococcal  
477 virulence via global epigenetic changes. *Nat Commun* 5:doi:10.1038/ncomms6055.
- 478 21. De Ste Croix M, Vacca I, Kwun MJ, Ralph JD, Bentley SD, Haigh R, Croucher NJ, Oggioni  
479 MR. 2017. Phase-variable methylation and epigenetic regulation by type I restriction-  
480 modification systems. *FEMS Microbiol Rev* 41:S3-S15.
- 481 22. Helm RA, Seifert HS. 2010. Frequency and rate of pilin antigenic variation of *Neisseria*  
482 *meningitidis*. *J Bacteriol* 192:3822-3.
- 483 23. Seifert HS. 1996. Questions about gonococcal pilus phase- and antigenic variation. *Mol*  
484 *Microbiol* 21:433-40.
- 485 24. Sechman EV, Rohrer MS, Seifert HS. 2005. A genetic screen identifies genes and sites  
486 involved in pilin antigenic variation in *Neisseria gonorrhoeae*. *Mol Microbiol* 57:468-83.
- 487 25. Oliver MB, Basu Roy A, Kumar R, Lefkowitz EJ, Swords WE. 2017. *Streptococcus*  
488 *pneumoniae* TIGR4 Phase-Locked Opacity Variants Differ in Virulence Phenotypes.  
489 *mSphere* 2.
- 490 26. Atack JM, Weinert LA, Tucker AW, Husna AU, Wileman TM, N FH, Hoa NT, Parkhill J,  
491 Maskell DJ, Blackall PJ, Jennings MP. 2018. *Streptococcus suis* contains multiple phase-  
492 variable methyltransferases that show a discrete lineage distribution. *Nucleic Acids Res*  
493 doi:10.1093/nar/gky913:10.1093/nar/gky913.
- 494 27. Haigh RD, Crawford LA, Ralph JD, Wanford JJ, Vartoukian SR, Hijazi K, Wade W,  
495 Oggioni MR. 2017. Draft Whole-Genome Sequences of Periodontal Pathobionts  
496 *Porphyromonas gingivalis*, *Prevotella intermedia*, and *Tannerella forsythia* Contain Phase-  
497 Variable Restriction-Modification Systems. *Genome Announcements* 5:e01229-17.
- 498 28. Qi J, Luo H, Hao B. 2004. CVTree: a phylogenetic tree reconstruction tool based on whole  
499 genomes. *Nucleic Acids Res* 32:W45-7.
- 500 29. Xu Z, Hao B. 2009. CVTree update: a newly designed phylogenetic study platform using  
501 composition vectors and whole genomes. *Nucleic Acids Res* 37:W174-8.
- 502 30. Qi J, Wang B, Hao BI. 2004. Whole proteome prokaryote phylogeny without sequence  
503 alignment: a K-string composition approach. *J Mol Evol* 58:1-11.
- 504 31. Clark TA, Murray IA, Morgan RD, Kislyuk AO, Spittle KE, Boitano M, Fomenkov A,  
505 Roberts RJ, Korlach J. 2012. Characterization of DNA methyltransferase specificities using  
506 single-molecule, real-time DNA sequencing. *Nucleic Acids Res* 40:e29.
- 507 32. Murray IA, Clark TA, Morgan RD, Boitano M, Anton BP, Luong K, Fomenkov A, Turner  
508 SW, Korlach J, Roberts RJ. 2012. The methylomes of six bacteria. *Nucleic Acids Res*  
509 40:11450-11462.
- 510 33. Roberts RJ, Vincze T, Posfai J, Macelis D. 2015. REBASE-a database for DNA restriction  
511 and modification: enzymes, genes and genomes. *Nucleic Acids Res* 43:D298-D299.
- 512 34. Guérillot R, Kostoulias X, Donovan L, Li L, Carter GP, Hachani A, Vandelannoote K,  
513 Giulieri S, Monk IR, Kunitomo M, Starrs L, Burgio G, Seemann T, Peleg AY, Stinear TP,

- 514 Howden BP. 2019. Unstable chromosome rearrangements in *Staphylococcus aureus* cause  
515 phenotype switching associated with persistent infections. *Proceedings of the National*  
516 *Academy of Sciences of the United States of America* 116:20135-20140.
- 517 35. Umarov RK, Solovyev VV. 2017. Recognition of prokaryotic and eukaryotic promoters  
518 using convolutional deep learning neural networks. *PLOS ONE* 12:e0171410.
- 519 36. de Jong A, Pietersma H, Cordes M, Kuipers OP, Kok J. 2012. PePPER: a webserver for  
520 prediction of prokaryote promoter elements and regulons. *BMC Genomics* 13:299.
- 521 37. Fagerlund A, Langsrud S, Schirmer BC, Moretro T, Heir E. 2016. Genome Analysis of  
522 *Listeria monocytogenes* Sequence Type 8 Strains Persisting in Salmon and Poultry  
523 Processing Environments and Comparison with Related Strains. *PLoS One* 11:e0151117.
- 524 38. Atack JM, Guo C, Yang L, Zhou Y, Jennings MP. 2020. DNA sequence repeats identify  
525 numerous Type I restriction-modification systems that are potential epigenetic regulators  
526 controlling phase-variable regulons; phasevarions. *FASEB J* 34:1038-1051.  
527
- 528

529 **Figure legends**

530

531 **Figure 1 - Illustration of how phase-variable switching of inverting Type I systems occurs.**

532 Type I R-M loci are made up of three genes, encoding a restriction enzyme (*hsdR*; *R*), a  
533 methyltransferase (*hsdM*; *M*) and a target sequence specificity protein (*hsdS*; *S*). Inverting type I  
534 systems contain an extra *hsdS* gene termed *hsdS'* (*S'*). Each *hsdS* gene is made up of two Target  
535 Recognition Domains (TRDs). In inverting systems there are multiple variable TRDs present in the  
536 two *hsdS* loci. In the illustrated example, there are two different 5'-TRDs (5'-TRD-1 in orange and  
537 5'-TRD-2 in white) and two different 3' TRDs (3'-TRD-1 in purple and 3'-TRD-2 in green).  
538 Inverted repeats are located before 5'-TRD (grey) and between the 5'-TRD and 3'-TRD (yellow).  
539 Recombination between these inverted repeats means that four possible *hsdS* coding sequences are  
540 present in the expressed *hsdS* locus: allele A = 5'-TRD-1 + 3'-TRD-1; allele B = 5'-TRD-1 + 3'-  
541 TRD-2; allele C = 5'-TRD-2 + 3'-TRD-2; allele D = 5'-TRD-2 + 3'-TRD-1. These four different  
542 *hsdS* variants mean four different HsdS proteins are produced. Following oligomerisation with an  
543 HsdM dimer to form an active methyltransferase, the four different HsdS protein subunits result in  
544 four different methyltransferase specificities. This would be described as a 'four-way' or 'four-  
545 phase' switch, as four different HsdS proteins are produced from the four different *hsdS* genes  
546 possible in the expressed *hsdS* locus.

547

548 **Figure 2 – Illustration of our search methodology.** All Type I *hsdS* loci were downloaded from  
549 REBASE. These loci were then broken down into 20bp tiled fragments, each staggered by 1 bp  
550 (fragment 1 = bp1-20, fragment 2 = bp2-21, etc). These tiles were then used as a search term to  
551 search for 100% identical fragments in the opposite orientation, i.e., inverted, 30kb upstream of the  
552 annotated start codon and 30kb downstream of the annotated stop codon of the *hsdS* gene under  
553 investigation. Although we searched both upstream and downstream of the annotated *hsdS* gene  
554 understudy, we have only shown the downstream search in this illustration for simplicity.

555

556 **Figure 3 – A) schematic representation of Type I loci with multiple variable *hsdS* genes**  
557 **containing inverted repeats from three important veterinary pathogens.** Coloured arrows  
558 represent variable *hsdS* genes. Blue arrows indicate that a gene with high identity to a  
559 recombinase/integrase is present at the locus; **B) Illustration of the mode of switching of the**  
560 **four-way switch occurring in *Streptococcus suis*.** *S. suis* contains a Type I locus containing  
561 duplicated variable *hsdS* loci containing inverted repeats (SSU1271-SSU1274 in *S. suis* strain  
562 P1/7). As illustrated in Figure 1, each *hsdS* gene is made up of separate 5' (red and white) and 3'  
563 (blue and green) TRDs. Inverted repeats are present before the 5' TRD (grey) and between the 5'

564 and 3' TRDs (yellow). Each TRD recognises a different 3bp DNA sequence, giving rise to 4  
565 separate HsdS proteins that are predicted to methylate four different DNA sequences dependent on  
566 the TRDs present. We have solved the specificity of allele A (5'TRD-1 [red] + 3'TRD-1 [blue]) and  
567 allele B (5'TRD-1 [red] + 3'TRD-2 [green]) . 5'TRD-1 (red) recognises CCA, 3'TRD-1 (blue)  
568 recognises CTT, 3'TRD-2 (green) recognises DNH. D = A, G, or T; N = any nucleotide; H = A, C,  
569 or T. XXX = the recognition motif is undetermined.

570

571 **Figure 4** – The whole-genome phylogenetic tree was constructed by CVTree (Version-3.0.0) for 128  
572 strains of *Listeria monocytogenes* annotated in REBASE. Red circles indicate strains that  
573 containing Type I systems containing duplicated *hsdS* genes containing inverted repeats. The  
574 distance measures the dissimilarity of each strain.

575

576 **Figure 5 – A)** Type I *hsdS* gene showing the location of the 5' and the 3' TRD, and the inverted  
577 repeats. Sequence analysis of representative examples of each *hsdS* gene present in *Enterococcus*  
578 *faecalis*. Alignments were carried out using ClustalW, and visualized in JalView overview feature.  
579 Blue colour indicates % nucleotide identity; **B)** The whole genome phylogenetic tree was constructed  
580 by CVTree (Version-3.0.0) for 34 strains of *Enterococcus faecalis* annotated in REBASE. Red  
581 circles indicate strains that containing Type I systems containing duplicated *hsdS* genes containing  
582 inverted repeats. The distance measures the dissimilarity of each strain.

583

584 **Supplementary Data 1** – all Type I *hsdS* genes downloaded from REBASE

585

586 **Supplementary Data 2** – all IRs found in *hsdS* genes

587

588 **Supplementary Data 3** – all representative *hsdS* genes with IRs

589

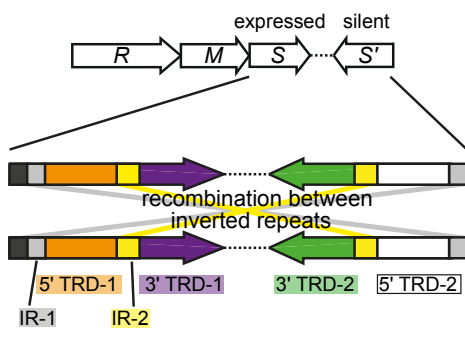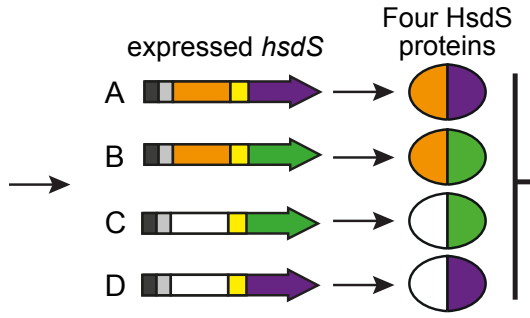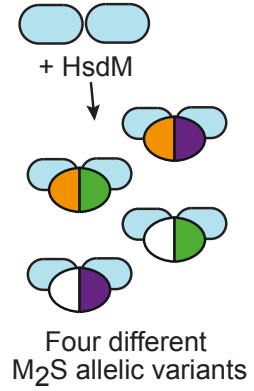

Type I R-M systems in REBASE

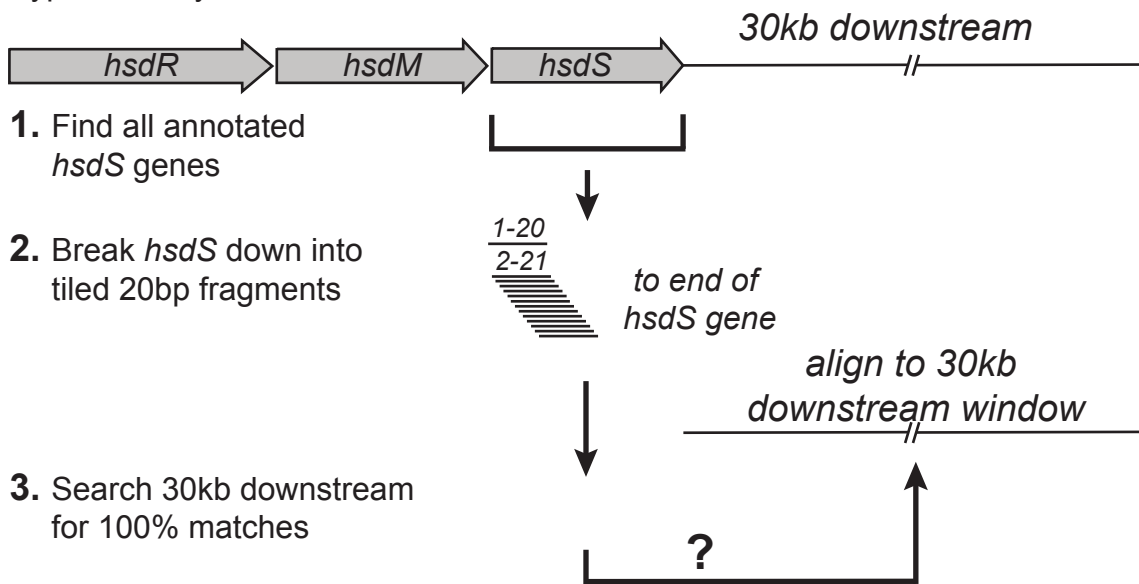



A

*Actinobacillus pleuropneumoniae*

e.g., strain AP76

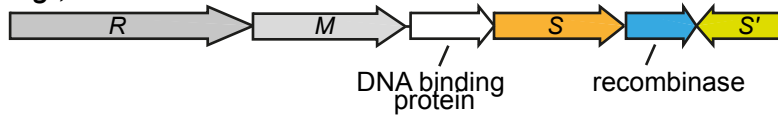

*Mannheimia haemolytica*

e.g., strain 193

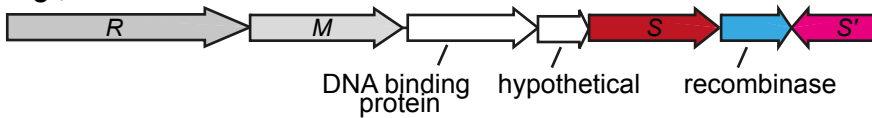

*Streptococcus suis*

e.g., strain P1/7

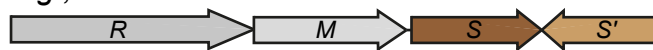

B

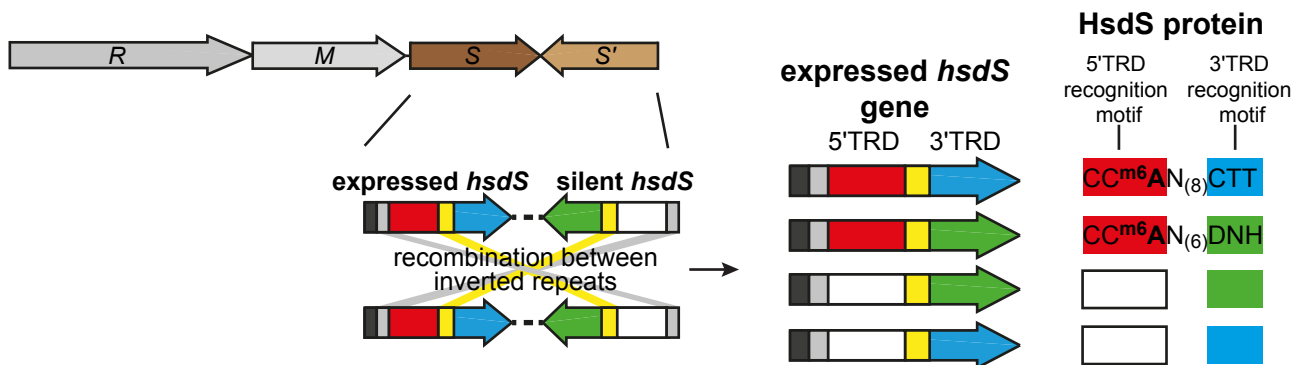

0.01

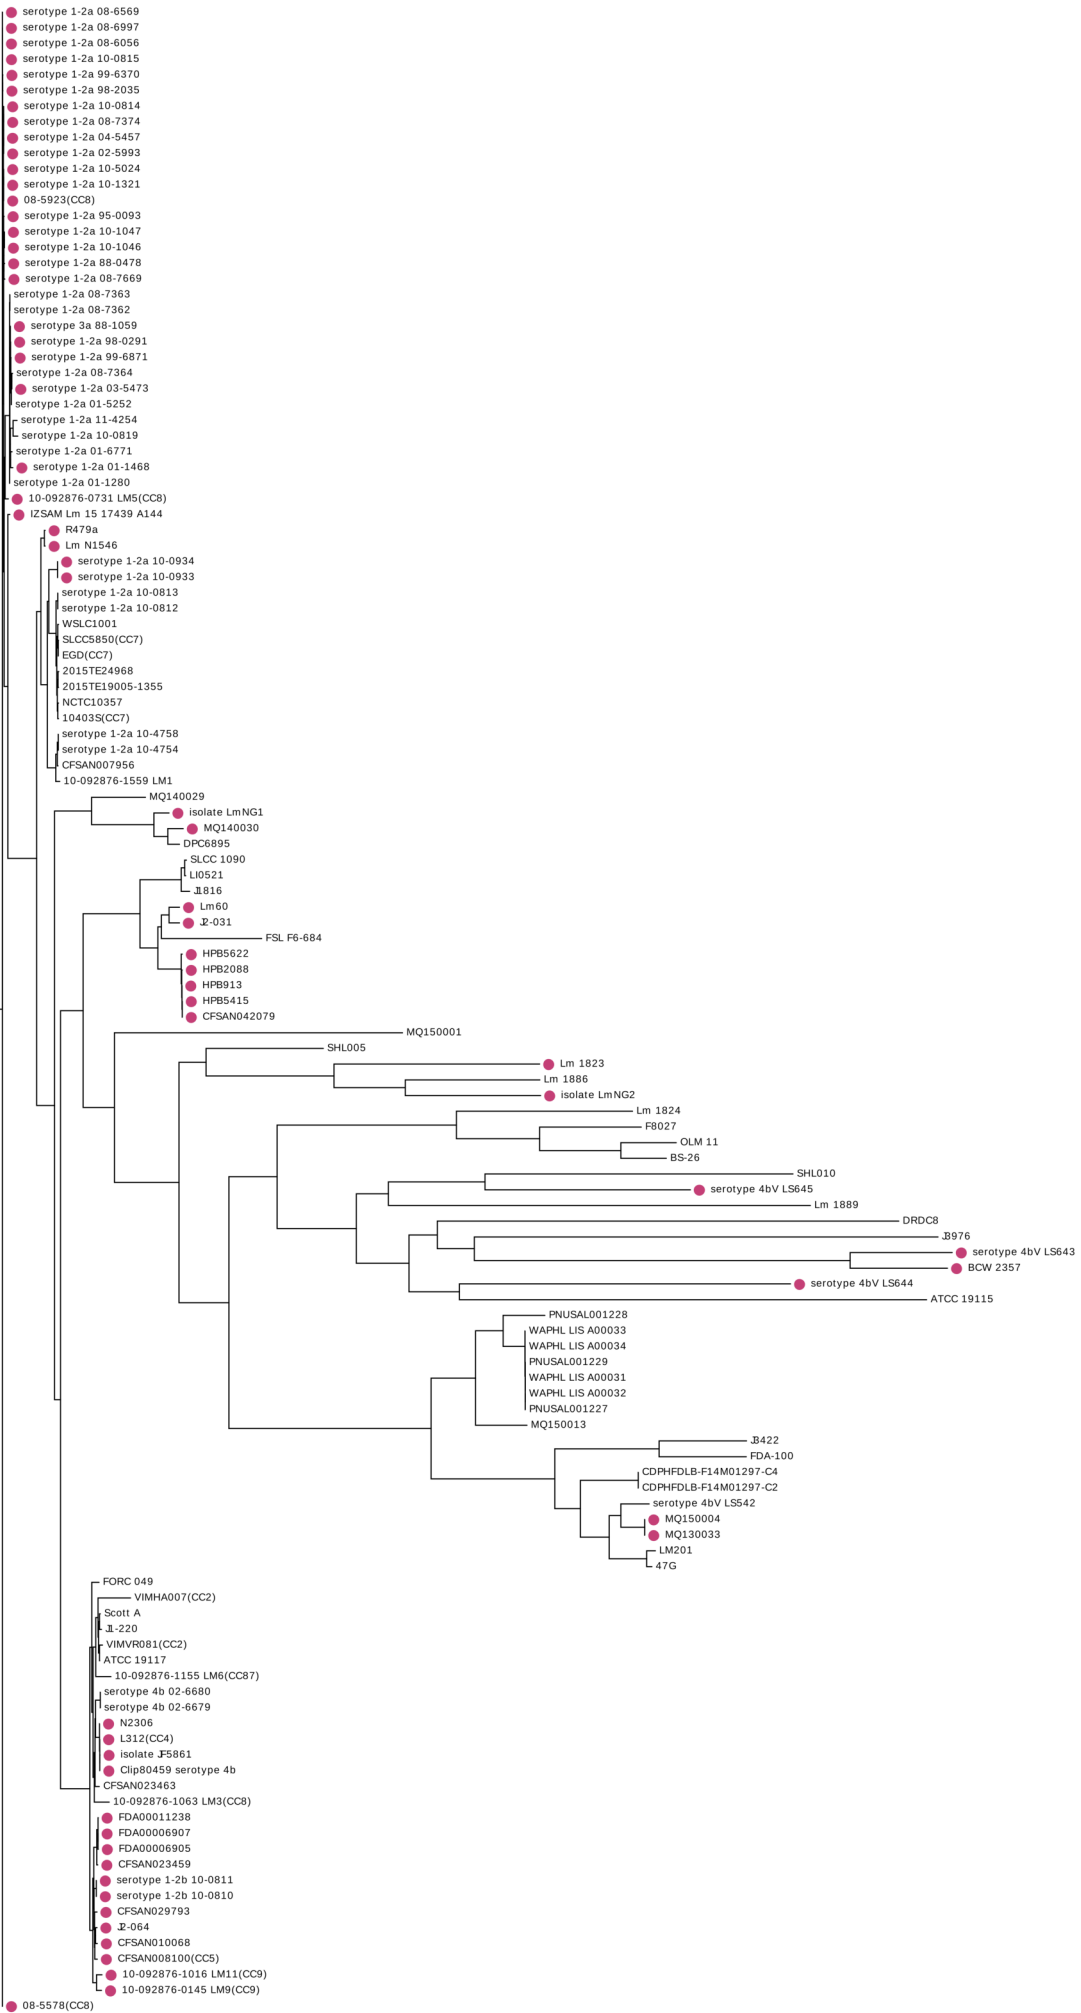

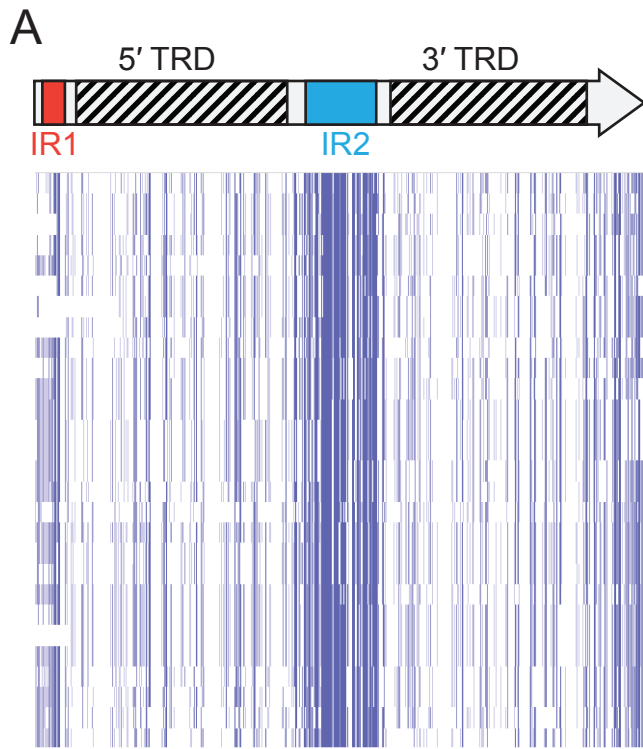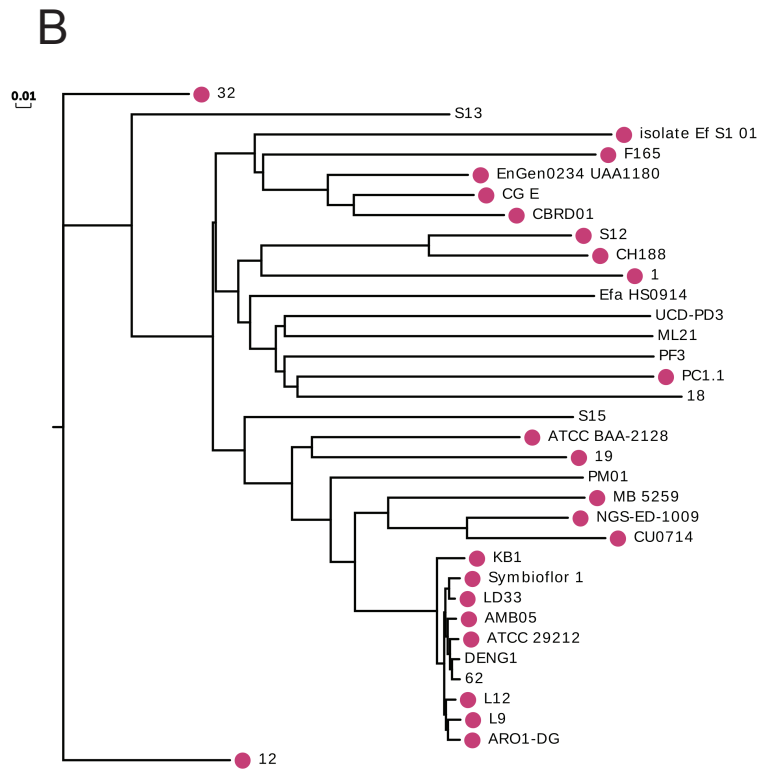

Source: https://biorxiv.org/content/10.1101/2020.06.18.137471v1.full.pdf
